# Supplementary material for: Oxygen insertion at the cage center: an unconventional tuning strategy for enhancing the photocatalytic performance of atomically precise copper cluster cocatalysts
Source: Royal Society of Chemistry journal article supplement (doi:10.1039/d3ta07218e), 2024-01-01
Supplement: d3ta07218e1.pdf [file d3ta07218e1.pdf]

*Supporting Information*

**Oxygen Insertion at Cage Center: An Unconventional Tuning  
Strategy for Enhancing the Photocatalytic Performance of  
Atomically Precise Copper Cluster Cocatalysts**

Yun-Dong Cao,<sup>a</sup> Di Yin,<sup>a</sup> Ming-Liang Wang,<sup>a</sup> Hong Liu,<sup>\*a</sup> Yi Feng,<sup>a</sup> Lin-Lin Fan,<sup>\*a</sup> Cai-Li  
Lv<sup>a</sup> and Guang-Gang Gao<sup>\*a</sup>

<sup>a</sup> *School of Materials Science and Engineering, University of Jinan, 250022, Jinan, China*

\* Corresponding authors

E-mail: mse\_liuh@ujn.edu.cn; mse\_fanll@ujn.edu.cn; mse\_gaogg@ujn.edu.cn.

# Table of Contents

## Experimental methods

## Supporting figures

- Fig. S1.** Packing mode of  $\text{Cu}_{14}$ . Color code: Cu, orange; C, gray; S, purple; P, pink; O, red; F, green.
- Fig. S2.** Packing mode of  $\text{O@Cu}_{14}$ . Color code: Cu, orange; C, gray; S, purple; P, pink; O, red; F, green.
- Fig. S3.** Total crystal structures of  $[\text{Cu}_{14}]$  (a) and  $[\text{O@Cu}_{14}]$  (c). Cluster core structures of  $[\text{Cu}_{14}]$  (b) and  $[\text{O@Cu}_{14}]$  (d). Color code: Cu, orange; C, gray; S, purple; P, pink; O, red; F, green.
- Fig. S4.** Presentation of the structures of  $[\text{O@Cu}_{14}]$  and  $\text{O@Cu}_{14}$  in space-filling mode and the  $\pi$ - $\pi$  interactions. Color code: Cu, orange; C, gray; S, purple; P, pink; O, red; F, green.
- Fig. S5.** Hirshfeld surfaces mapped over  $d_{\text{norm}}$ ,  $d_e$  and  $d_i$  for  $\text{Cu}_{14}$ ,  $\text{O@Cu}_{14}$ ,  $[\text{Cu}_{14}]$  and  $[\text{O@Cu}_{14}]$ .
- Fig. S6.** Fingerprint plots corresponding to C-H $\cdots$ F contacts involved in the structure of  $[\text{Cu}_{14}]$  and  $[\text{O@Cu}_{14}]$ .
- Fig. S7.** UV-Vis absorption spectra of  $\text{Cu}_{14}$ ,  $\text{O@Cu}_{14}$  and  $[\text{Cu}_{14}][\text{O@Cu}_{14}]$ .
- Fig. S8.** The cation-mode electrospray mass spectrometry spectra of  $\text{Cu}_{14}$ .
- Fig. S9.** The cation-mode electrospray mass spectrometry spectra of  $\text{O@Cu}_{14}$ .
- Fig. S10.** The cation-mode electrospray mass spectrometry spectra of  $[\text{Cu}_{14}][\text{O@Cu}_{14}]$ .
- Fig. S11.** HRTEM images of g- $\text{C}_3\text{N}_4(\text{OH})$  nanosheets.
- Fig. S12.** XPS spectra for Cu 2p (a), S 2p (b) and P 2p (c) of  $[\text{Cu}_{14}][\text{O@Cu}_{14}]$  and  $[\text{Cu}_{14}][\text{O@Cu}_{14}]\text{@g-C}_3\text{N}_4(\text{OH})$ . (d) XPS spectra for O 1s of  $[\text{Cu}_{14}][\text{O@Cu}_{14}]$ ,  $[\text{Cu}_{14}][\text{O@Cu}_{14}]\text{@g-C}_3\text{N}_4(\text{OH})$  and g- $\text{C}_3\text{N}_4(\text{OH})$ . XPS spectra of O 1s were collected after  $\text{Ar}^+$  sputtering.
- Fig. S13.** The Auger Cu LMM spectra of  $\text{Cu}_{14}$ ,  $\text{O@Cu}_{14}$ ,  $[\text{Cu}_{14}][\text{O@Cu}_{14}]$  and  $[\text{Cu}_{14}][\text{O@Cu}_{14}]\text{@g-C}_3\text{N}_4(\text{OH})$ .
- Fig. S14.** (a) The FTIR spectra of  $\text{Cu}_{14}$ ,  $\text{Cu}_{14}\text{@g-C}_3\text{N}_4(\text{OH})$  and g- $\text{C}_3\text{N}_4(\text{OH})$  nanosheets. (b) The FTIR spectra of  $\text{O@Cu}_{14}$ ,  $\text{O@Cu}_{14}\text{@g-C}_3\text{N}_4(\text{OH})$  and g- $\text{C}_3\text{N}_4(\text{OH})$  nanosheets.
- Fig. S15.** Photocatalytic performance of copper clusters ( $\text{Cu}_{14}$ ,  $\text{O@Cu}_{14}$  and  $[\text{Cu}_{14}][\text{O@Cu}_{14}]$ ), physically mixed copper clusters and g- $\text{C}_3\text{N}_4$  nanosheets ( $\text{Cu}_{14}/\text{g-C}_3\text{N}_4(\text{OH})$ ,  $\text{O@Cu}_{14}/\text{g-C}_3\text{N}_4(\text{OH})$  and  $[\text{Cu}_{14}][\text{O@Cu}_{14}]/\text{g-C}_3\text{N}_4(\text{OH})$ ), the as-prepared photocatalysts ( $\text{Cu}_{14}\text{@g-C}_3\text{N}_4(\text{OH})$ ,  $\text{O@Cu}_{14}\text{@g-C}_3\text{N}_4(\text{OH})$ ,  $[\text{Cu}_{14}][\text{O@Cu}_{14}]\text{@g-C}_3\text{N}_4(\text{OH})$ ).
- Fig. S16.** The wavelength-dependent AQY of  $[\text{Cu}_{14}][\text{O@Cu}_{14}]\text{@g-C}_3\text{N}_4(\text{OH})$  for photocatalytic  $\text{H}_2$  evolution.
- Fig. S17.** The TEM image of  $[\text{Cu}_{14}][\text{O@Cu}_{14}]\text{@g-C}_3\text{N}_4(\text{OH})$  after photocatalytic  $\text{H}_2$  evolution.

**Fig. S18.** The FTIR spectrum of  $[\text{Cu}_{14}][\text{O}@\text{Cu}_{14}]\text{@g-C}_3\text{N}_4(\text{OH})$  after photocatalytic  $\text{H}_2$  evolution.

**Fig. S19.** XPS spectra for Cu 2p (a), S 2p (b), P 2p (c) and O 1s (d) of  $[\text{Cu}_{14}][\text{O}@\text{Cu}_{14}]\text{@g-C}_3\text{N}_4(\text{OH})$  after photocatalytic  $\text{H}_2$  evolution.

**Fig. S20.** DPV of  $\text{Cu}_{14}$  (a),  $\text{O}@\text{Cu}_{14}$  (b) and  $[\text{Cu}_{14}][\text{O}@\text{Cu}_{14}]$  (c). The UPS spectra of  $\text{Cu}_{14}$  (d),  $\text{O}@\text{Cu}_{14}$  (e) and  $[\text{Cu}_{14}][\text{O}@\text{Cu}_{14}]$  (f). The energies of the secondary electron cutoff edge of  $\text{Cu}_{14}$  (g),  $\text{O}@\text{Cu}_{14}$  (h) and  $[\text{Cu}_{14}][\text{O}@\text{Cu}_{14}]$  (i). The energies of the injection potential barrier edge of  $\text{Cu}_{14}$  (j),  $\text{O}@\text{Cu}_{14}$  (k) and  $[\text{Cu}_{14}][\text{O}@\text{Cu}_{14}]$  (l).

**Fig. S21.** (a) The UV-Vis diffuse reflectance spectrum of  $\text{g-C}_3\text{N}_4(\text{OH})$ . (b) The bond gap of  $\text{g-C}_3\text{N}_4(\text{OH})$  estimated by the Tauc plot of KubelkaMunk function:  $((\alpha h\nu)^2 = C(h\nu - E_g))$ . (c) The UPS spectra  $\text{g-C}_3\text{N}_4(\text{OH})$ . (d) The energies of the secondary electron cutoff edge of  $\text{g-C}_3\text{N}_4(\text{OH})$ . (e) and the energies of the injection potential barrier edge of  $\text{g-C}_3\text{N}_4(\text{OH})$ .

### Supporting tables

**Table S1.** Metric Data of the Known Clusters of with  $\text{Cu}_8$  cages encapsulating central atoms.

**Table S2.** Comparison of photocatalytic  $\text{H}_2$  evolution activities of crystalline Cu-based photocatalysts.

## Experimental methods

**Chemicals.** All chemicals are commercially available without further purification. Benzyl mercaptan, Tetrakis(acetonitrile)copper(I) hexafluorophosphate, acetonitrile (HPLC grade) and melamine were obtained from Sigma Aldrich. LiNO<sub>3</sub> and borane-tert-butylamine complex were obtained from aladdin. Tris(4-fluorophenyl)phosphine, sodium hydroxide, dichloromethane (CH<sub>2</sub>Cl<sub>2</sub>, HPLC grade), triethanolamine and methanol (HPLC grade) were obtained from Macklin.

**Single crystal X-ray diffraction analysis.** Single-Crystal X-ray Diffraction Analysis measurements were performed on a Rigaku XtaLAB Pro diffractometer with Mo-K $\alpha$  radiation ( $\lambda = 0.71073 \text{ \AA}$ ) and Cu-K $\alpha$  radiation ( $\lambda = 1.54186 \text{ \AA}$ ) at 173 K. Data collection and reduction were performed using the program CrysAlisPro<sup>1</sup>. The intensities were corrected for absorption using the empirical method implemented in SCALE3 ABSPACK scaling algorithm. The structures were solved with intrinsic phasing methods (SHELXT-2015)<sup>2</sup>, and refined by full-matrix least-squares on F<sup>2</sup> using OLEX2,<sup>3</sup> which utilizes the SHELXL-2015 module.<sup>3</sup> The crystal structures are visualized by DIAMOND 3.2.<sup>4</sup>

**Materials and characterization.** A Nicolet 6700 spectrophotometer was used to record the FTIR spectra with KBr as the phragmoid auxiliary material. The phases of the samples were tested by Rigaku SmartLab 9KW X-ray diffraction (XRD). High resolution transmission electron microscopy (HRTEM) diagrams patterns were recorded on a JEM-2100Plus transmission electron microscope instrument with 200 kV of accelerating voltage. A CEL-SPH2N photo catalysis system was used to obtain performance of water splitting reaction. A CHI660E electrochemical workbench was carried out to collect electrochemical performances. UV-Vis diffuse reflectance spectra were measured using a Shimadzu UV-visible spectrophotometer UV-8000. The FI emission spectra was detected by a shimadzu fluorescence spectrophotometer RF-6000 with the excitation wavelength at 320 nm. XPS and UPS data were obtained using a Thermo Fisher ESCALAB Xi+ spectrometer.

**Photocatalysis.** A CEL-SPH2N photo catalysis system was used to collect the performances of photocatalytic activities. Argon was purged through the reactor for 1 h before reaction to remove the residual air. During the photocatalytic experiment, A 300 W Xe lamp (CELHXF300) with a 400 nm filter was used as the light source ( $\lambda > 400 \text{ nm}$ ) to trigger the photocatalytic generation of H<sub>2</sub> with the efficient irradiation area of 15.90 cm<sup>2</sup>. Typically, in the photocatalytic H<sub>2</sub> evolution reaction, 10 mg of as-prepared photocatalysts were added to the mixed solution (water: TEOA = 4: 1) with continuous stirring. The solution volume was kept at 50 mL. During the whole experiment, the reactor was treated with a cooling pump to maintain the temperature at 6 °C. The amount of generated gas was detected by the GC7920-TF2ZA2 gas chromatograph (TCD, N<sub>2</sub> gas carrier). Blank experiments revealed no appreciable gas evolution without irradiation or photocatalysts.

**Apparent Quantum Yield (AQY) tests.** The AQY for photocatalytic H<sub>2</sub> evolution were collected under the illumination of a 300 W Xe lamp (CELHXF300) with bandpass filters ( $\lambda = 400\pm 10, 420\pm 10, 450\pm 10, 550\pm 10, 650\pm 10$  nm) used to provide the monochromatic light. A CEL-NP2000 irradiation meter was used to collect light intensity and incident photons. Generally, for a photocatalytic H<sub>2</sub> evolution system, the AQY value was calculated according to the following equation:

$$\begin{aligned} \text{AQY}(\%) &= \frac{\text{Number of reacted electrons}}{\text{Number of incident photons}} \times 100\% \\ &= \frac{\text{Number of evolved hydrogen molecules} \times 2}{\text{Number of incident photons}} \end{aligned}$$

**Transient photocurrent response tests.** The transient photocurrent response curves of photocatalysts were measured by a CHI660E electrochemical workstation under the same light with a photocatalytic test in 0.1 M Na<sub>2</sub>SO<sub>4</sub> in a three-electrode cell, in which the Ag/AgCl electrode and Pt wire were used as reference and counter electrodes, respectively. The preparation of the working electrode was as follows: 5 mg of catalyst was added into the system of water (650  $\mu$ L), Nafion (50  $\mu$ L) and Isopropyl alcohol (350  $\mu$ L) before ultrasonic dispersion for 30 min. Afterwards, the resultant mixture (5  $\mu$ L) was dried on the surface of glassy carbon.

**UV-Vis diffuse reflectance spectrum tests.** UV-Vis diffuse reflectance spectra were measured using a Shimadzu UV-visible spectrophotometer UV-8000. The solid samples were ground and crushed before testing. Background calibration and baseline calibration were performed on the instrument before sample testing. The band gaps were extracted by Kubelka-Munk method.

## Supporting figures

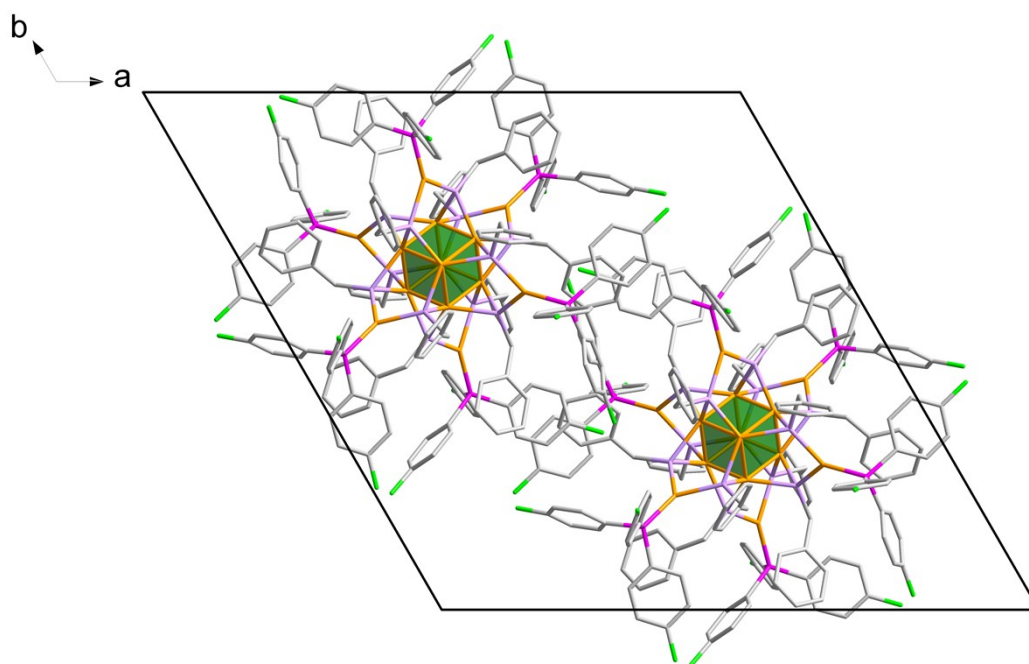

**Fig. S1.** Packing mode of  $\text{Cu}_{14}$ . Color code: Cu, orange; C, gray; S, purple; P, pink; O, red; F, green.

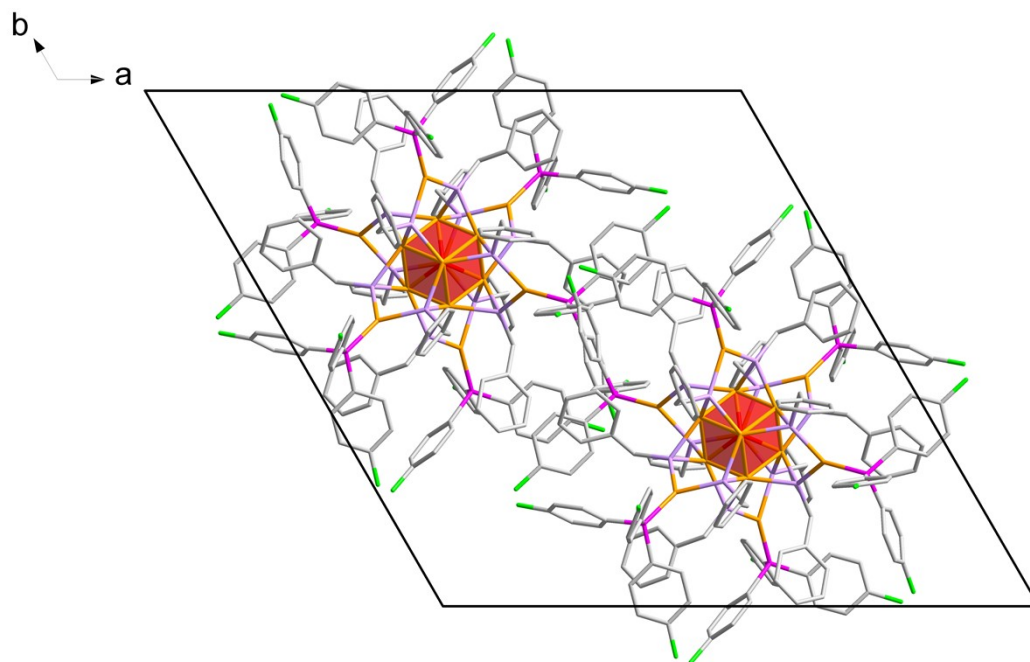

**Fig. S2.** Packing mode of **O@Cu<sub>14</sub>**. Color code: Cu, orange; C, gray; S, purple; P, pink; O, red; F, green.

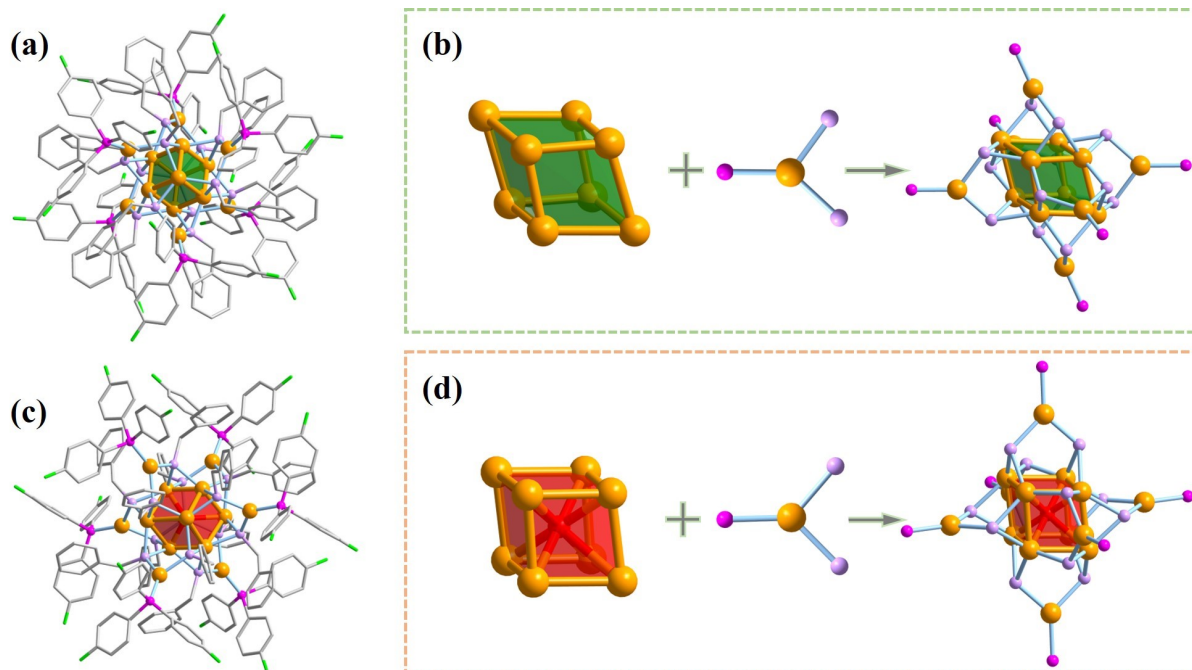

**Fig. S3.** Total crystal structures of  $[\text{Cu}_{14}]$  (a) and  $[\text{O}@\text{Cu}_{14}]$  (c). Cluster core structures of  $[\text{Cu}_{14}]$  (b) and  $[\text{O}@\text{Cu}_{14}]$  (d). Color code: Cu, orange; C, gray; S, purple; P, pink; O, red; F, green.



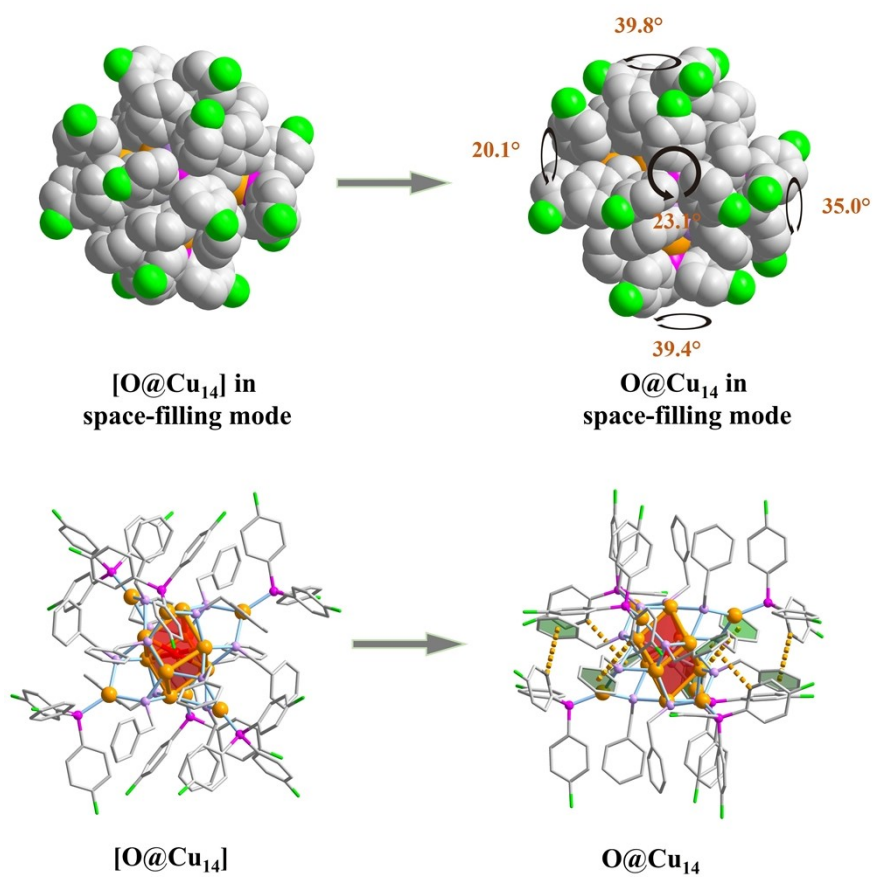

**Fig. S4.** Presentation of the structures of **[O@Cu<sub>14</sub>]** and **O@Cu<sub>14</sub>** in space-filling mode and the  $\pi$ - $\pi$  interactions. Color code: Cu, orange; C, gray; S, purple; P, pink; O, red; F, green.

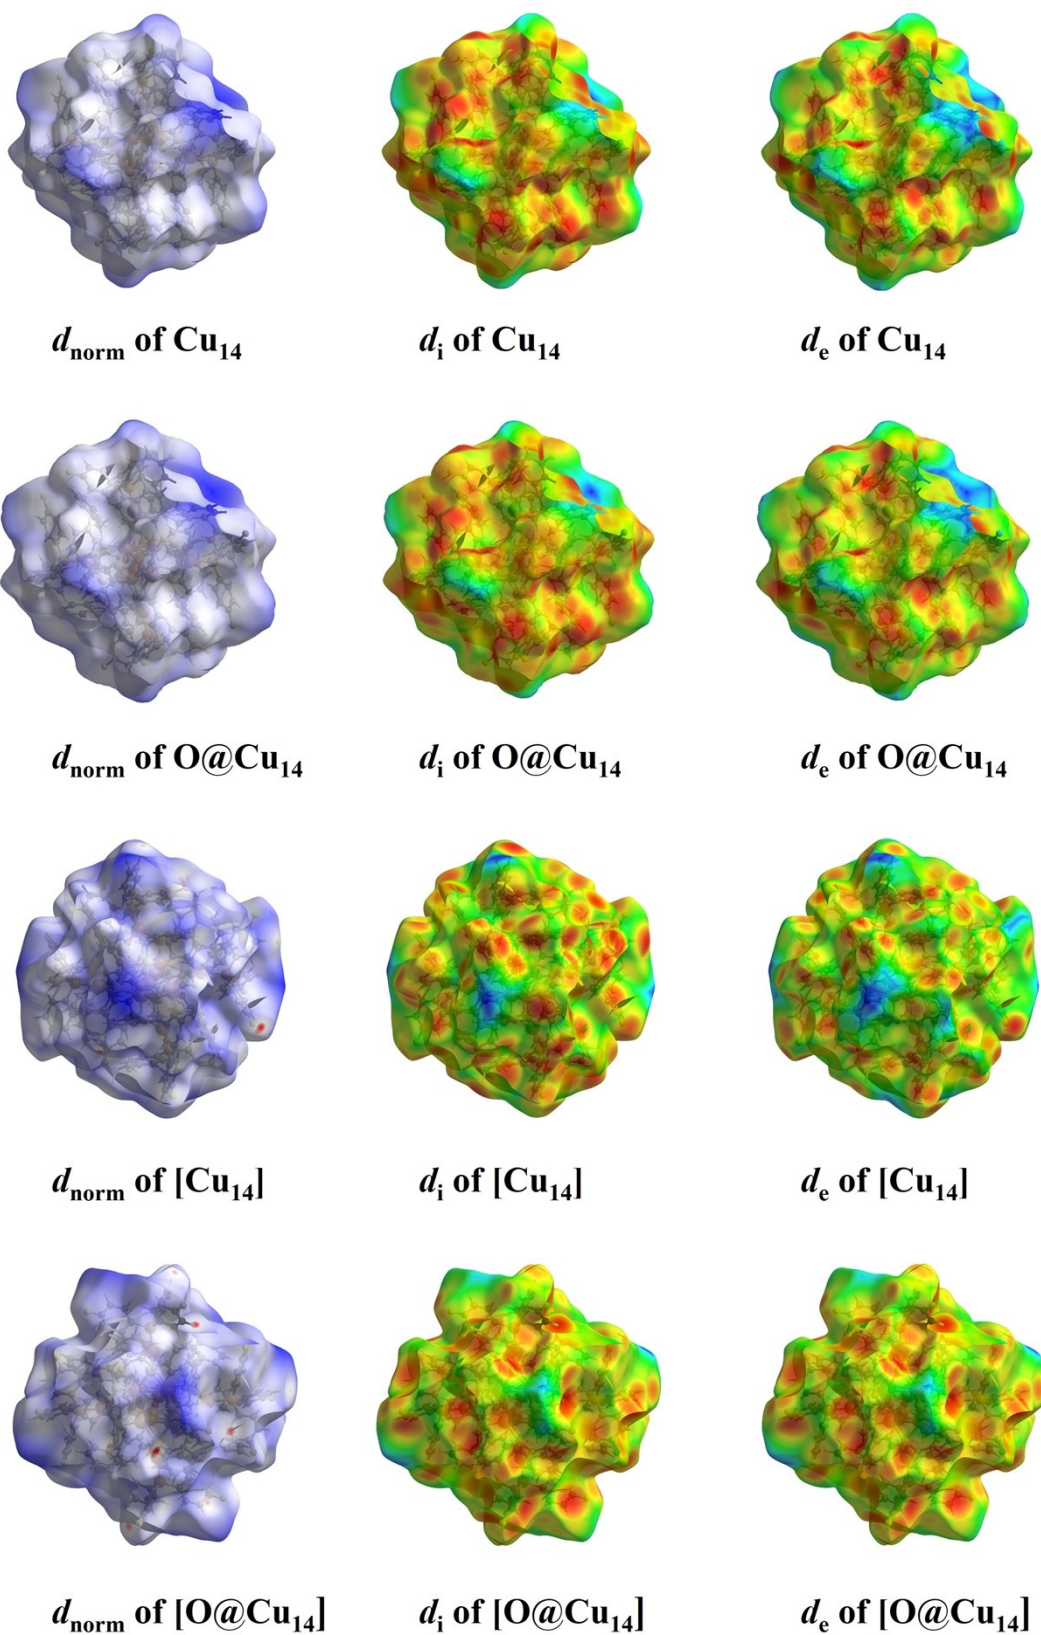

**Fig. S5.** Hirshfeld surfaces mapped over  $d_{\text{norm}}$ ,  $d_e$  and  $d_i$  for  $\text{Cu}_{14}$ ,  $\text{O@Cu}_{14}$ ,  $[\text{Cu}_{14}]$  and  $[\text{O@Cu}_{14}]$ .

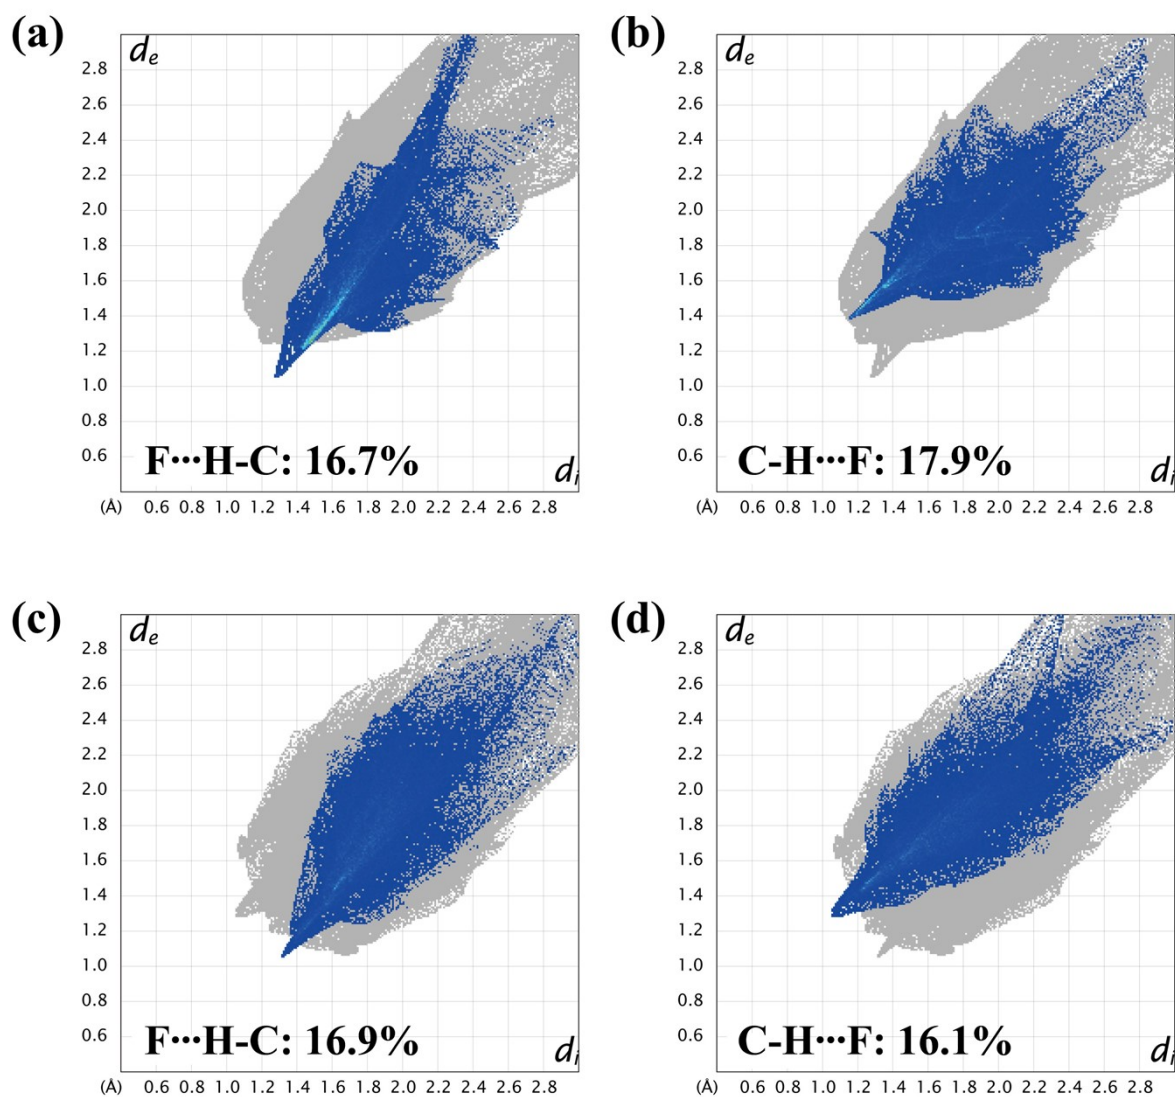

**Fig. S6.** Fingerprint plots corresponding to C-H...F contacts involved in the structure of [Cu<sub>14</sub>] and [O@Cu<sub>14</sub>].

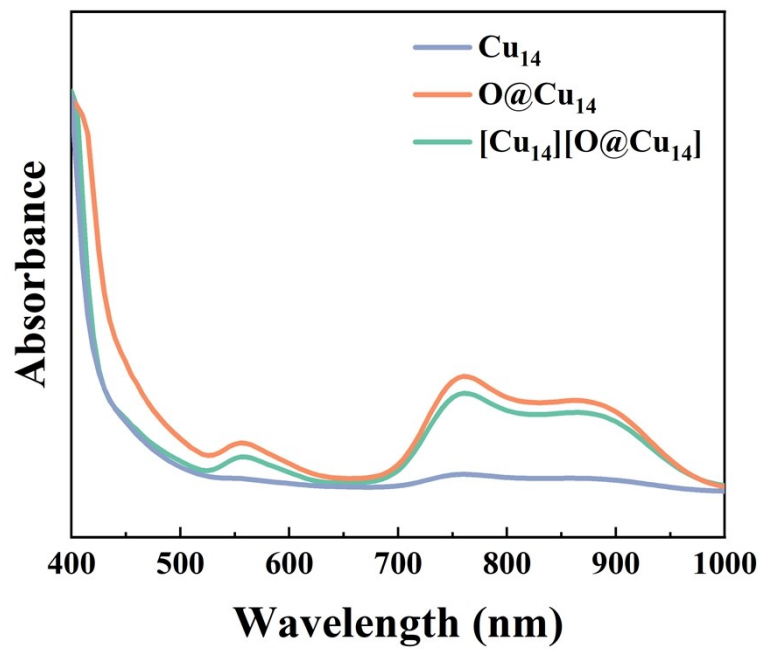

**Fig. S7.** UV-Vis absorption spectra of  $\text{Cu}_{14}$ ,  $\text{O@Cu}_{14}$  and  $[\text{Cu}_{14}][\text{O@Cu}_{14}]$ .

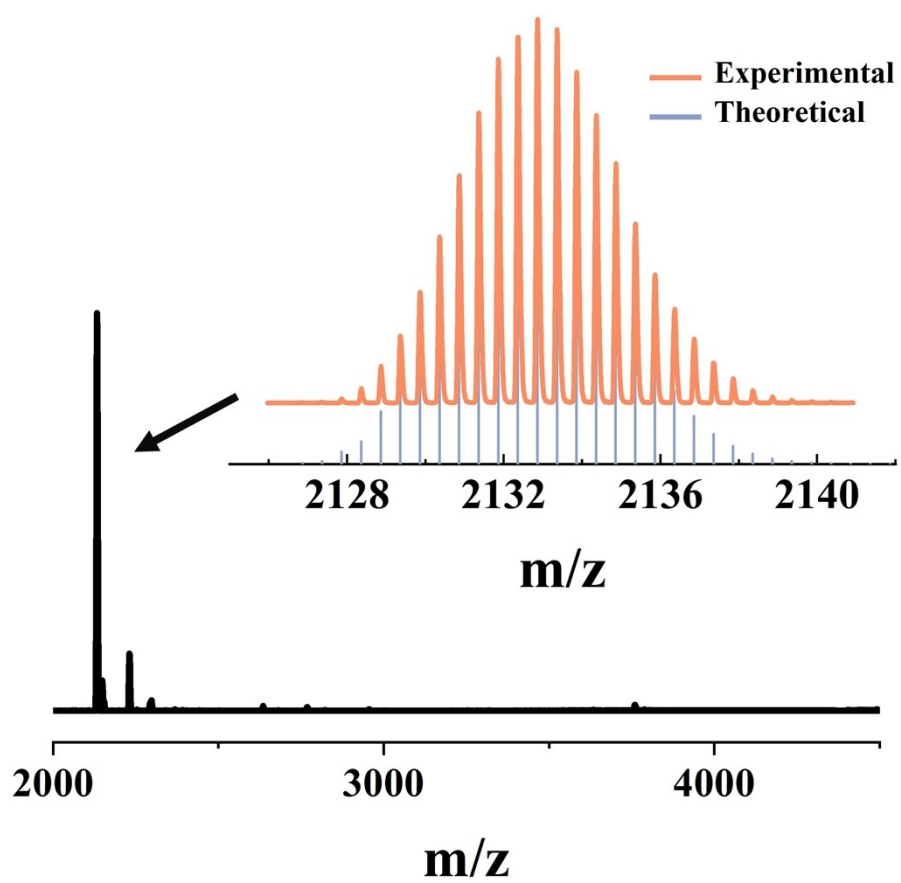

**Fig. S8.** The cation-mode electrospray mass spectrometry spectra of  $\text{Cu}_{14}$ .

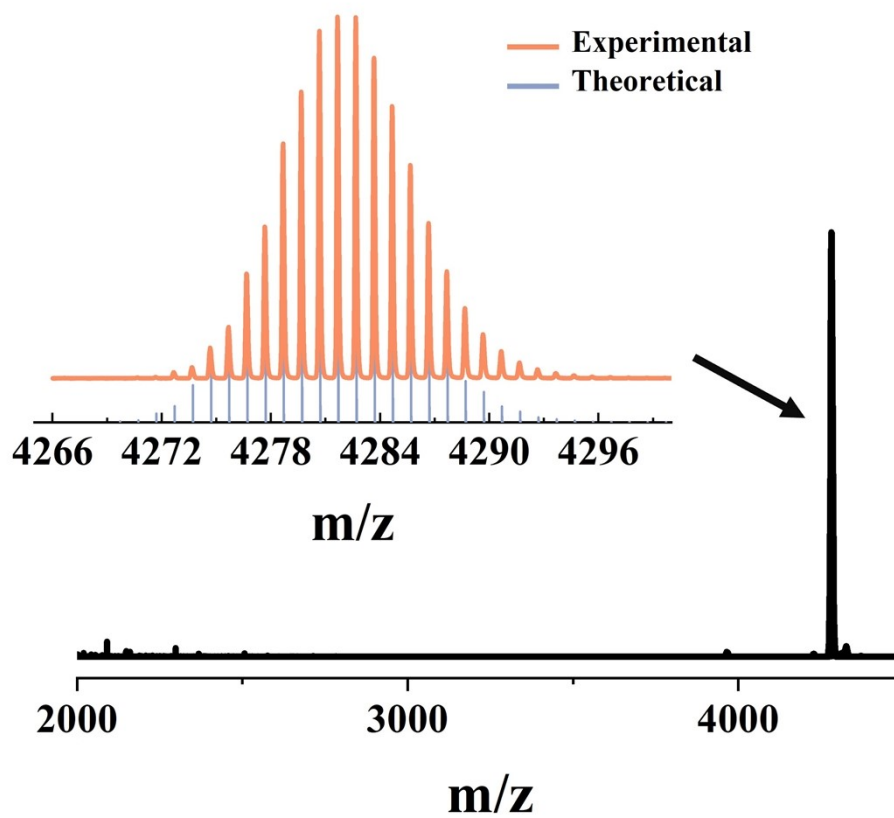

**Fig. S9.** The cation-mode electrospray mass spectrometry spectra of O@Cu<sub>14</sub>.

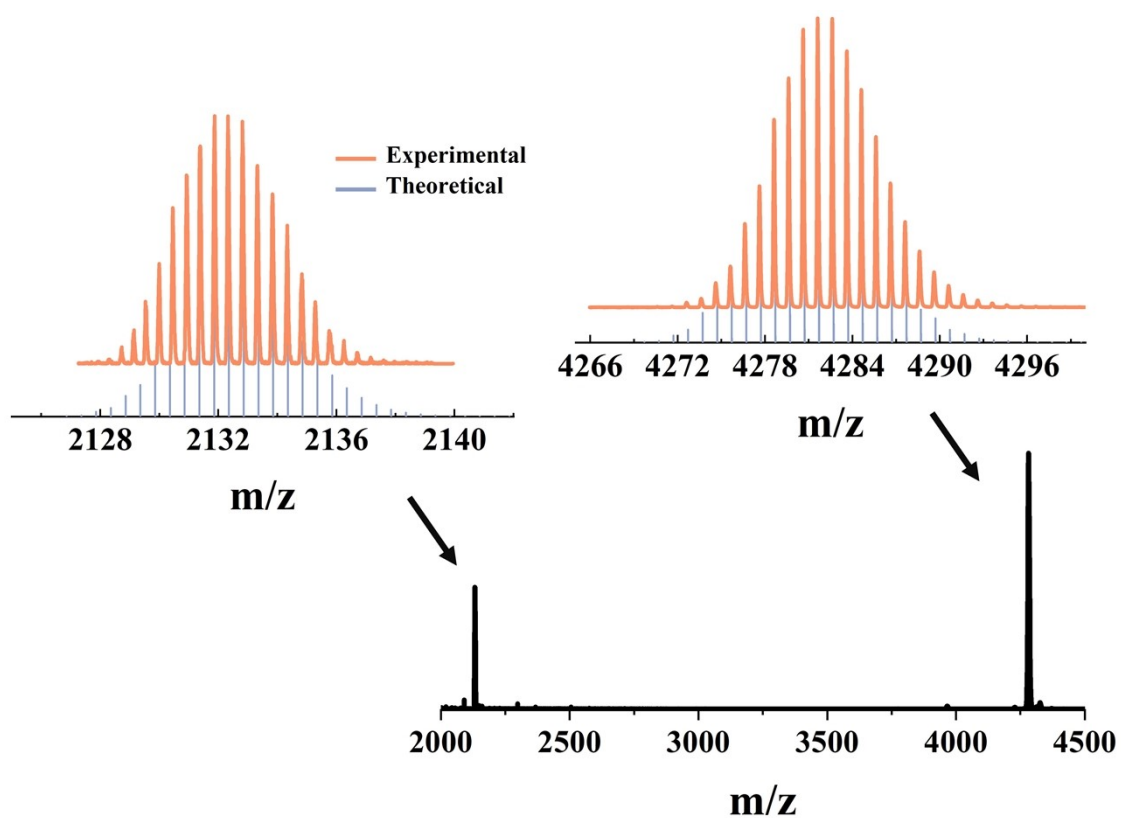

**Fig. S10.** The cation-mode electrospray mass spectrometry spectra of  $[\text{Cu}_{14}][\text{O@Cu}_{14}]$ .

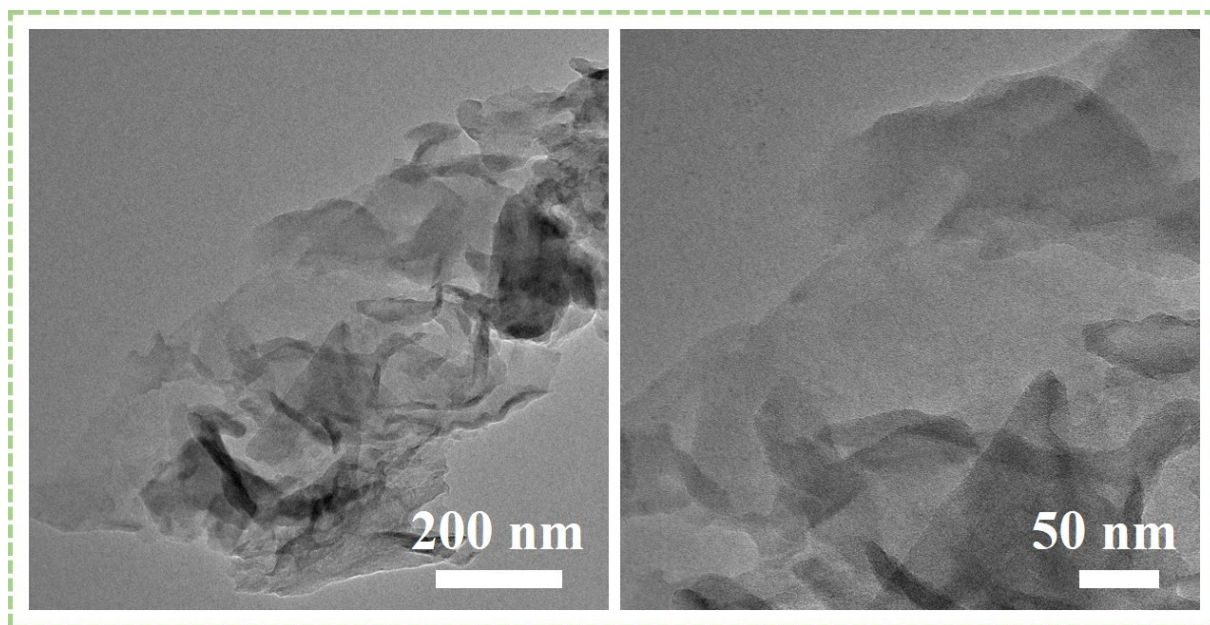

**Fig. S11.** HRTEM images of g-C<sub>3</sub>N<sub>4</sub>(OH) nanosheets.



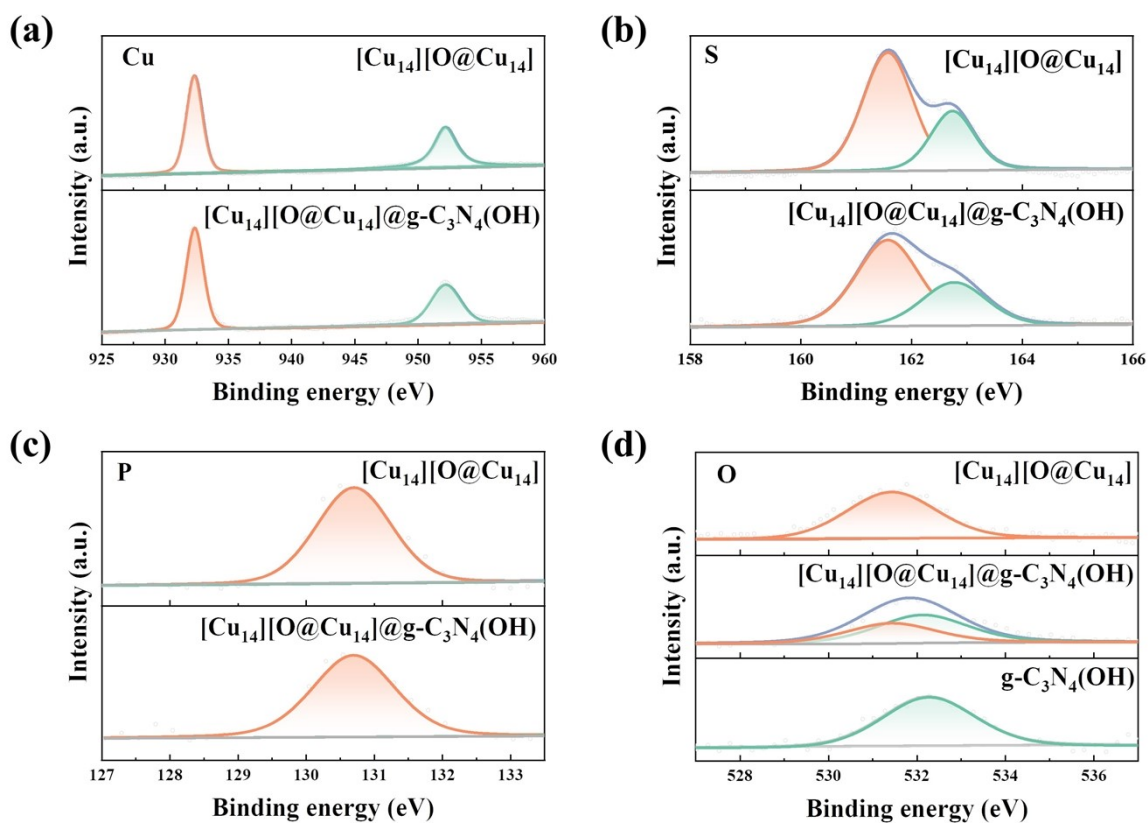

**Fig. S12.** XPS spectra for Cu 2p (a), S 2p (b) and P 2p (c) of  $[\text{Cu}_{14}][\text{O}@\text{Cu}_{14}]$  and  $[\text{Cu}_{14}][\text{O}@\text{Cu}_{14}]\text{@g-C}_3\text{N}_4(\text{OH})$ . (d) XPS spectra for O 1s of  $[\text{Cu}_{14}][\text{O}@\text{Cu}_{14}]$ ,  $[\text{Cu}_{14}][\text{O}@\text{Cu}_{14}]\text{@g-C}_3\text{N}_4(\text{OH})$  and  $\text{g-C}_3\text{N}_4(\text{OH})$ . XPS spectra of O 1s were collected after  $\text{Ar}^+$  sputtering.

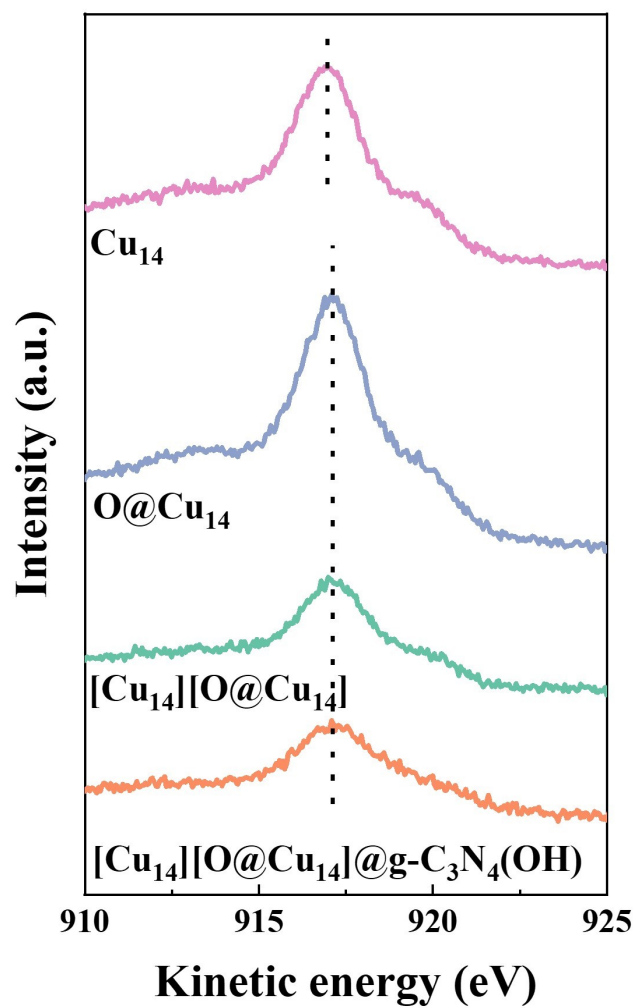

**Fig. S13.** The Auger Cu LMM spectra of  $\text{Cu}_{14}$ ,  $\text{O@Cu}_{14}$ ,  $[\text{Cu}_{14}][\text{O@Cu}_{14}]$  and  $[\text{Cu}_{14}][\text{O@Cu}_{14}]\text{@g-C}_3\text{N}_4(\text{OH})$ .

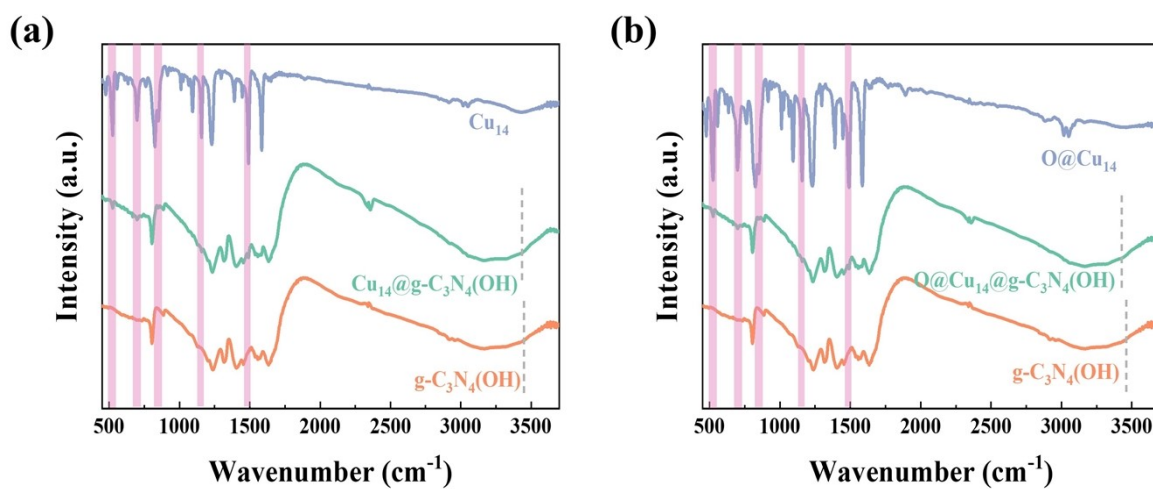

**Fig. S14.** (a) The FTIR spectra of Cu<sub>14</sub>, Cu<sub>14</sub>@g-C<sub>3</sub>N<sub>4</sub>(OH) and g-C<sub>3</sub>N<sub>4</sub>(OH) nanosheets. (b) The FTIR spectra of O@Cu<sub>14</sub>, O@Cu<sub>14</sub>@g-C<sub>3</sub>N<sub>4</sub>(OH) and g-C<sub>3</sub>N<sub>4</sub>(OH) nanosheets.

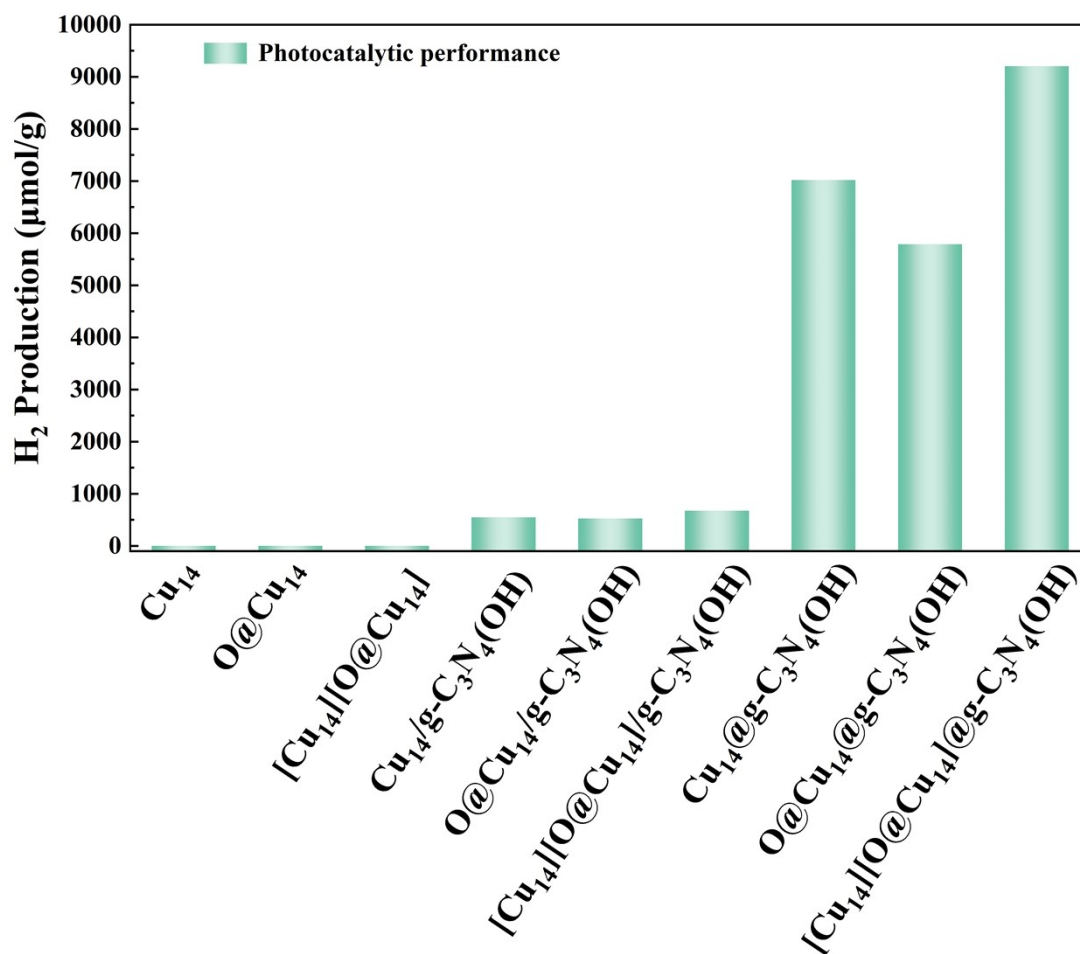

**Fig. S15.** Photocatalytic performance of copper clusters (Cu<sub>14</sub>, O@Cu<sub>14</sub> and [Cu<sub>14</sub>][O@Cu<sub>14</sub>]), physically mixed copper clusters and g-C<sub>3</sub>N<sub>4</sub> nanosheets (Cu<sub>14</sub>/g-C<sub>3</sub>N<sub>4</sub>(OH), O@Cu<sub>14</sub>/g-C<sub>3</sub>N<sub>4</sub>(OH) and [Cu<sub>14</sub>][O@Cu<sub>14</sub>]/g-C<sub>3</sub>N<sub>4</sub>(OH)), the as-prepared photocatalysts (Cu<sub>14</sub>@g-C<sub>3</sub>N<sub>4</sub>(OH), O@Cu<sub>14</sub>@g-C<sub>3</sub>N<sub>4</sub>(OH), [Cu<sub>14</sub>][O@Cu<sub>14</sub>]@g-C<sub>3</sub>N<sub>4</sub>(OH)).

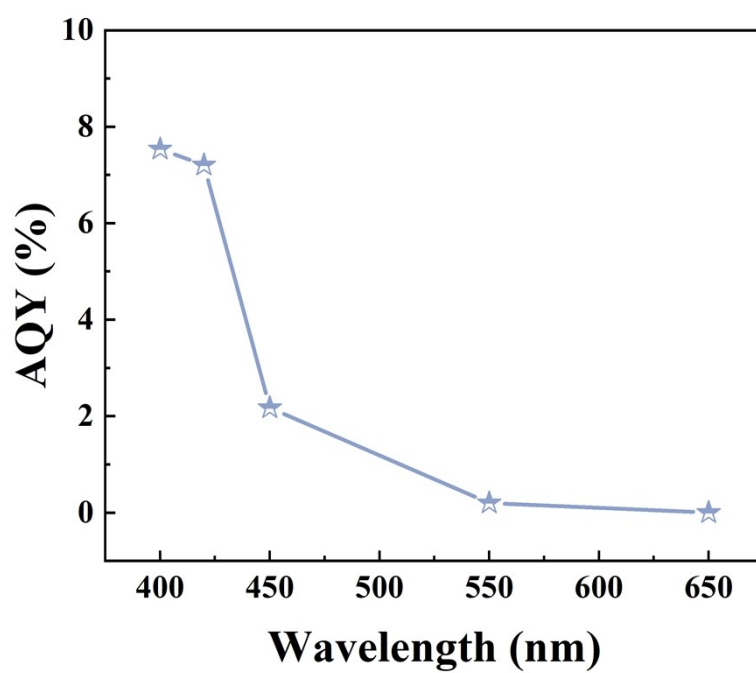

**Fig. S16.** The wavelength-dependent AQY of  $[\text{Cu}_{14}][\text{O}@\text{Cu}_{14}]\text{@g-C}_3\text{N}_4(\text{OH})$  for photocatalytic  $\text{H}_2$  evolution.

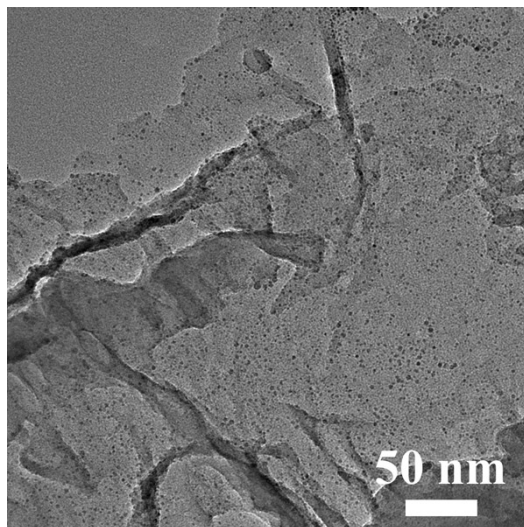

**Fig. S17.** The TEM image of  $[\text{Cu}_{14}][\text{O}@\text{Cu}_{14}]\text{@g-C}_3\text{N}_4(\text{OH})$  after photocatalytic  $\text{H}_2$  evolution.

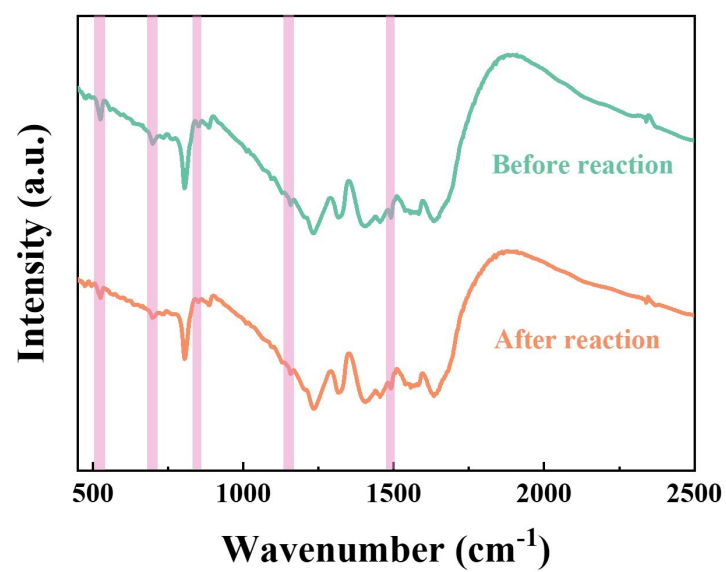

**Fig. S18.** The FTIR spectrum of  $[\text{Cu}_{14}][\text{O}@\text{Cu}_{14}]\text{@g-C}_3\text{N}_4(\text{OH})$  after photocatalytic  $\text{H}_2$  evolution.

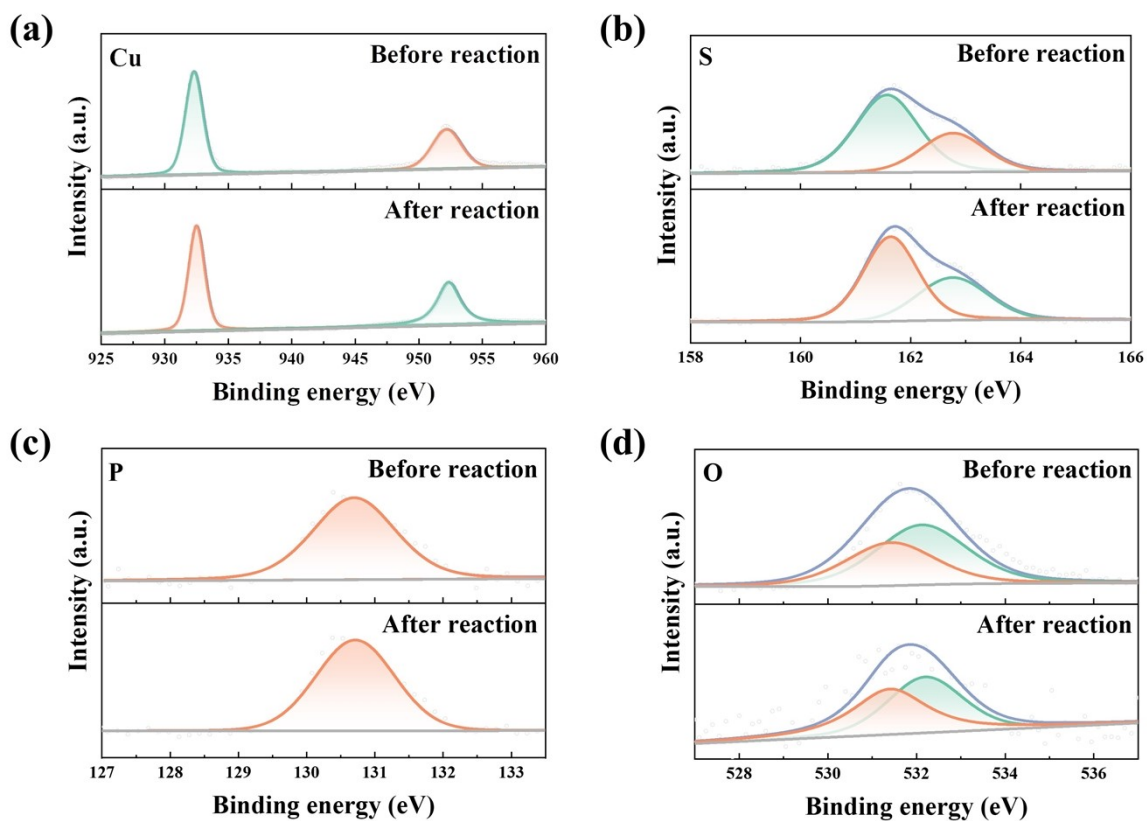

**Fig. S19.** XPS spectra for Cu 2p (a), S 2p (b), P 2p (c) and O 1s (d) of [Cu<sub>14</sub>][O@Cu<sub>14</sub>]@g-C<sub>3</sub>N<sub>4</sub>(OH) after photocatalytic H<sub>2</sub> evolution.



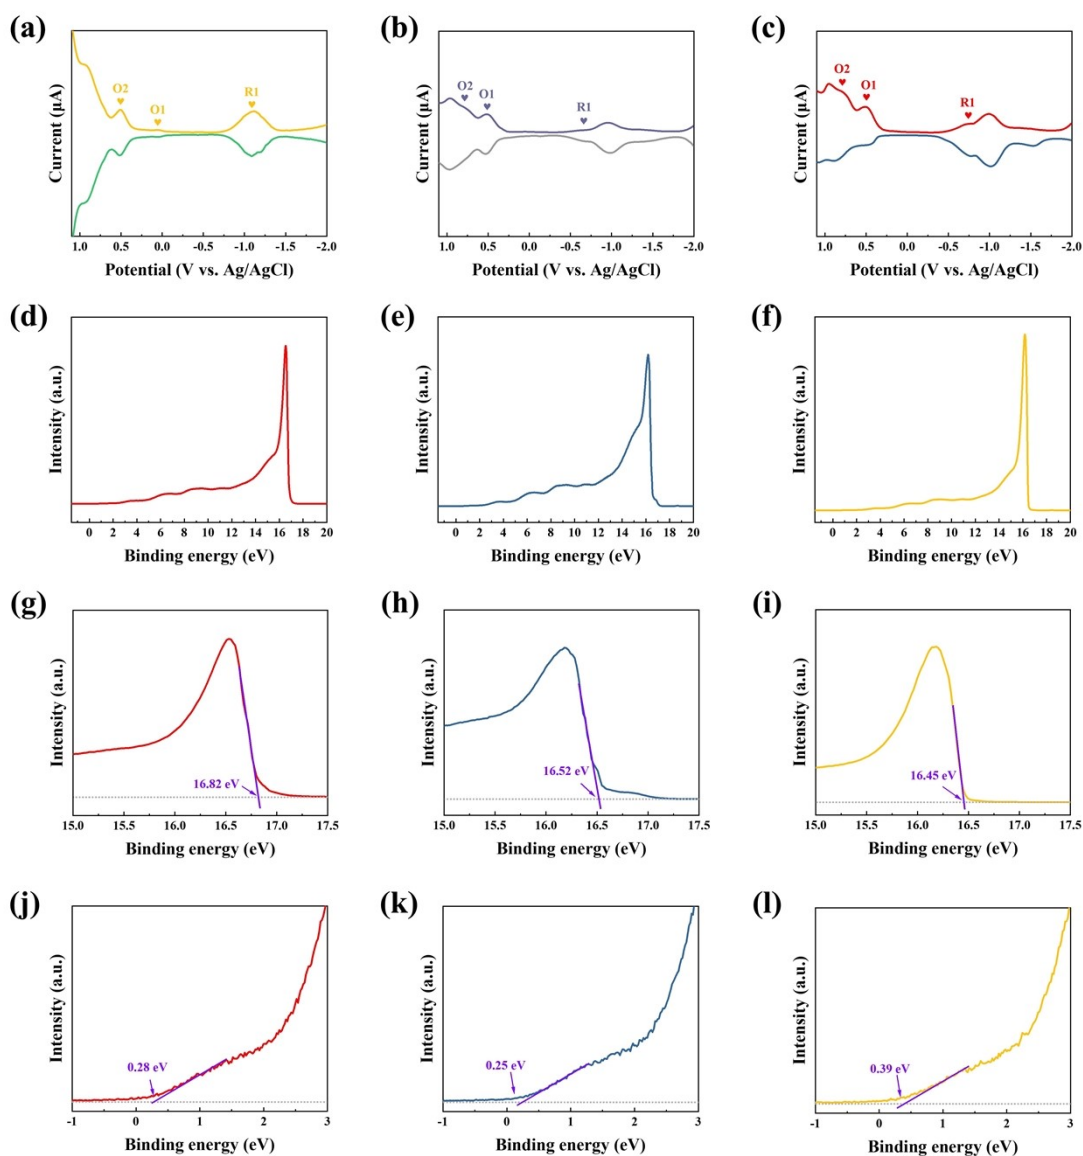

**Fig. S20.** DPV of  $\text{Cu}_{14}$  (a),  $\text{O@Cu}_{14}$  (b) and  $[\text{Cu}_{14}][\text{O@Cu}_{14}]$  (c). The UPS spectra of  $\text{Cu}_{14}$  (d),  $\text{O@Cu}_{14}$  (e) and  $[\text{Cu}_{14}][\text{O@Cu}_{14}]$  (f). The energies of the secondary electron cutoff edge of  $\text{Cu}_{14}$  (g),  $\text{O@Cu}_{14}$  (h) and  $[\text{Cu}_{14}][\text{O@Cu}_{14}]$  (i). The energies of the injection potential barrier edge of  $\text{Cu}_{14}$  (j),  $\text{O@Cu}_{14}$  (k) and  $[\text{Cu}_{14}][\text{O@Cu}_{14}]$  (l).

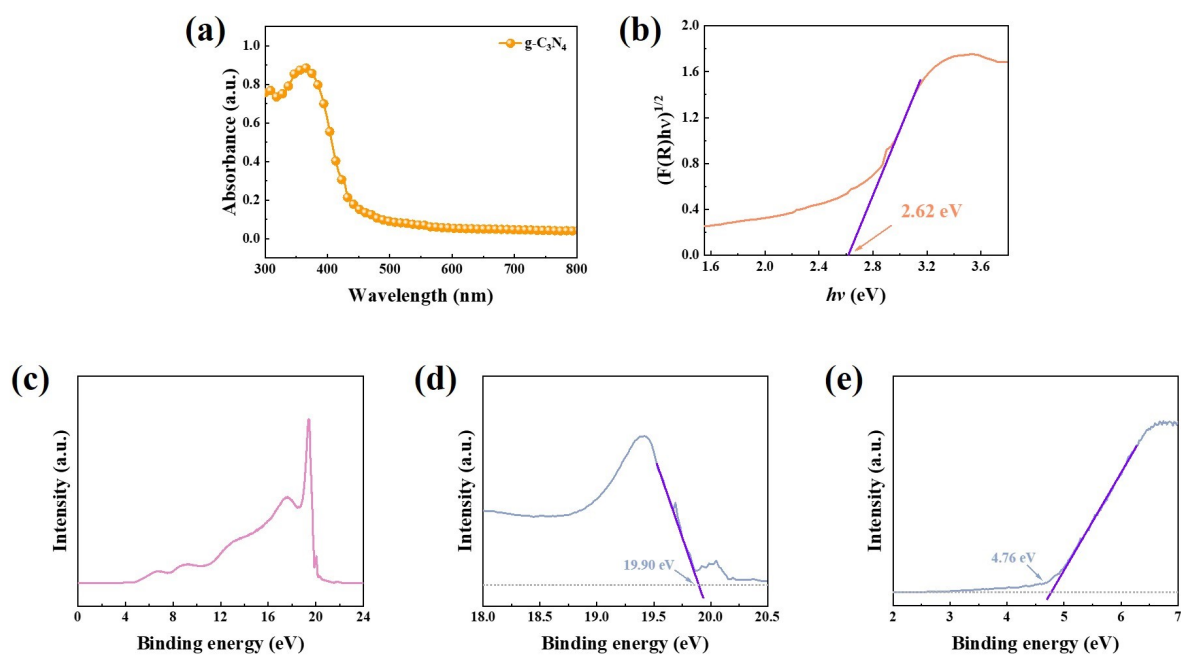

**Fig. S21.** (a) The UV-Vis diffuse reflectance spectrum of g-C<sub>3</sub>N<sub>4</sub>(OH). (b) The bond gap of g-C<sub>3</sub>N<sub>4</sub>(OH) estimated by the Tauc plot of KubelkaMunk function:  $((\alpha h\nu)^2 = C(h\nu - E_g))$ . (c) The UPS spectra g-C<sub>3</sub>N<sub>4</sub>(OH). (d) The energies of the secondary electron cutoff edge of g-C<sub>3</sub>N<sub>4</sub>(OH). (e) and the energies of the injection potential barrier edge of g-C<sub>3</sub>N<sub>4</sub>(OH).

**Table S1.** Metric Data of the Known Clusters of with Cu<sub>8</sub> cages encapsulating central atoms.

| Compound                                                                                               | Central atom | Average Cu-Cu distance (Å) | Ref.             |
|--------------------------------------------------------------------------------------------------------|--------------|----------------------------|------------------|
| [AuCu <sub>14</sub> (TBBT) <sub>12</sub> (TPP) <sub>6</sub> ] <sup>+</sup>                             | Au           | 3.110                      | 5                |
| [AuCu <sub>14</sub> (TBBT) <sub>12</sub> (TTP) <sub>6</sub> ] <sup>+</sup>                             | Au           | 3.091                      | 5                |
| [AuCu <sub>14</sub> (TBBT) <sub>12</sub> (T <sup>P</sup> TPP) <sub>6</sub> ] <sup>+</sup>              | Au           | 3.078                      | 5                |
| Au@Cu <sub>14</sub>                                                                                    | Au           | 3.132                      | 6                |
| [AuCu <sub>14</sub> (SR) <sub>12</sub> (PPh <sub>3</sub> ) <sub>6</sub> ] <sup>+</sup>                 | Au           | 3.123                      | 7                |
| [Cu <sub>8</sub> (μ <sub>8</sub> -Br){Se <sub>2</sub> P(OR) <sub>2</sub> }] <sub>6</sub>               | Br           | 3.171                      | 8                |
| Cu <sub>8</sub> (μ <sub>8</sub> -Br)[Se <sub>2</sub> P(OPr <sup>i</sup> ) <sub>2</sub> ] <sub>6</sub>  | Br           | 3.180                      | 9                |
| [Cu <sub>8</sub> (μ <sub>8</sub> -Se)[Se <sub>2</sub> P(OPr <sup>i</sup> ) <sub>2</sub> ] <sub>6</sub> | Se           | 2.928                      | 10               |
| Cu <sub>8</sub> (μ <sub>8</sub> -Se)[Se <sub>2</sub> P(OR) <sub>2</sub> ] <sub>6</sub>                 | Se           | 2.905                      | 11               |
| Cl@Cu <sub>14</sub>                                                                                    | Cl           | 3.253                      | 6                |
| [Cu <sub>14</sub> (D-Pen) <sub>12</sub> Cl] <sup>5-</sup>                                              | Cl           | 3.302                      | 12               |
| [Cu <sub>14</sub> (SC(CH <sub>3</sub> ) <sub>2</sub> COO) <sub>12</sub> Cl] <sup>5-</sup>              | Cl           | 3.355                      | 13               |
| {Cu <sub>8</sub> [S <sub>2</sub> P(OR) <sub>2</sub> ] <sub>6</sub> (μ <sub>8</sub> -S)}                | S            | 3.010                      | 14               |
| Cu <sub>8</sub> (μ-I)(μ <sub>6</sub> -S)(DTP) <sub>6</sub>                                             | S            | 3.163                      | 15               |
| {Cu <sub>8</sub> [S <sub>2</sub> P(O <sup>i</sup> Pr) <sub>2</sub> ] <sub>6</sub> (μ <sub>8</sub> -S)} | S            | 3.111                      | 16               |
| [Cu <sub>8</sub> (F)(S <sub>2</sub> P(O <sup>i</sup> Pr) <sub>2</sub> ) <sub>6</sub> ] <sup>+</sup>    | F            | 3.035                      | 17               |
| [Cu <sub>8</sub> (F)(S <sub>2</sub> P(OEt) <sub>2</sub> ) <sub>6</sub> ] <sup>+</sup>                  | F            | 2.971                      | 17               |
| <b>1</b>                                                                                               | -            | 2.685                      | <i>This work</i> |
| <b>2</b>                                                                                               | O            | 2.710                      | <i>This work</i> |
| <b>3</b>                                                                                               | O            | 2.786                      | <i>This work</i> |

**Table S2.** Comparison of photocatalytic H<sub>2</sub> evolution activities of crystalline Cu-based photocatalysts.

| Catalyst                                                                                                   | Sacrificial agent  | Solvent               | H <sub>2</sub> evolution                  | AQY/TON                     | Ref.             |
|------------------------------------------------------------------------------------------------------------|--------------------|-----------------------|-------------------------------------------|-----------------------------|------------------|
| <b>Cu<sub>14</sub>@g-C<sub>3</sub>N<sub>4</sub>(OH)</b>                                                    | TEOA               | H <sub>2</sub> O      | 0.96 mmol g <sup>-1</sup> h <sup>-1</sup> | -                           | <i>This work</i> |
| <b>O@Cu<sub>14</sub>@g-C<sub>3</sub>N<sub>4</sub>(OH)</b>                                                  | TEOA               | H <sub>2</sub> O      | 1.17 mmol g <sup>-1</sup> h <sup>-1</sup> | -                           | <i>This work</i> |
| <b>[Cu<sub>14</sub>][O@Cu<sub>14</sub>]<sub>n</sub>@g-C<sub>3</sub>N<sub>4</sub>(OH)</b>                   | TEOA               | H <sub>2</sub> O      | 1.53 mmol g <sup>-1</sup> h <sup>-1</sup> | AQY = 7.2% at 420 nm        | <i>This work</i> |
| <b>Cu-X-bpy</b>                                                                                            | MeOH               | TEA                   | 7.09 mmol g <sup>-1</sup> h <sup>-1</sup> | -                           | 18               |
| <b>Cu-RSH</b>                                                                                              | TEOA               | EtOH/H <sub>2</sub> O | 7.88 mmol g <sup>-1</sup> h <sup>-1</sup> | AQY = 4% (≥ 420 nm)         | 19               |
| <b>Cu-TiO<sub>2</sub> NFs/g-C<sub>3</sub>N<sub>4</sub></b>                                                 | TEOA               | H <sub>2</sub> O      | 1303 μmol g <sup>-1</sup> in 5 h          | -                           | 20               |
| <b>{[Cu<sup>I</sup>Cu<sup>II</sup><sub>2</sub>-(DCTP)<sub>2</sub>][NO<sub>3</sub>·1.5DMF]}<sub>n</sub></b> | MeOH               | H <sub>2</sub> O      | 160 μmol g <sup>-1</sup> in 5 h           | AQY = 2.3% at 420 nm        | 21               |
| <b>[Cu<sub>4</sub>(DNP)(SCN)Cl<sub>4</sub>]<sub>n</sub>/H<sub>2</sub>PtCl<sub>6</sub></b>                  | CH <sub>3</sub> OH | H <sub>2</sub> O      | 27.5 μmol g <sup>-1</sup> h <sup>-1</sup> | -                           | 22               |
| <b>Cu<sup>2+</sup>/Cu<sub>2</sub>O/Cu</b>                                                                  | TEA                | H <sub>2</sub> O      | 0.71 mL/h                                 | TOF = 173 h <sup>-1</sup>   | 23               |
| <b>Cu-salen</b>                                                                                            | TEA                | H <sub>2</sub> O      | -                                         | TON = 85 in 3 h             | 24               |
| <b>Cu(pyDAT)<sub>2</sub>(NO<sub>3</sub>)<sub>2</sub></b>                                                   | TEOA               | DMF                   | 0.48 mmol/h                               | TOF = 314 min <sup>-1</sup> | 25               |

## References

- (1) CrysAlisPro 2012, Agilent Technologies. Version 1.171.36.31.
- (2) G. M. Sheldrick, *Acta Cryst. A*, 2015, **71**, 3-8.
- (3) O. V. Dolomanov, L. J. Bourhis, R. J. Gildea, J. A. K. Howard, H. Puschmann, *J. Appl. Cryst.*, 2009, **42**, 339-341.
- (4) K. Brandenburg, *Diamond*, 2010.
- (5) H. Li, F. Song, D. Zhu, Y. Song, C. Zhou, F. Ke, L. Lu, X. Kang, M. Zhu, *J. Am. Chem. Soc.*, 2022, **144**, 4845-4852.
- (6) Y. Song, Y. Li, M. Zhou, X. Liu, H. Li, H. Wang, Y. Shen, M. Zhu, R. Jin, *Sci. Adv.*, 2021, **7**, eabd2091.
- (7) H. Shen, Y.-Z. Han, Q. Wu, J. Peng, B. K. Teo, N. Zheng, *Small methods*, 2021, **5**, 2000603.
- (8) C. W. Liu, C.-M. Hung, B. K. Santra, Y.-H. Chu, J.-C. Wang, Z. Lin, *Inorg. Chem.*, 2004, **43**, 4306-4314.
- (9) C. W. Liu, C.-M. Hung, H.-C. Chen, J.-C. Wang, T.-C. Keng, K. Guo, *Chem. Commun.*, 2000, 1897-1898.
- (10) C. W. Liu, H.-C. Chen, J.-C. Wang, T.-C. Keng, *Chem. Commun.*, 1998, 1831-1832.
- (11) C.-W. Liu, C.-M. Hung, J.-C. Wang, T.-C. Keng, *J. Chem. Soc., Dalton Trans.*, 2002, 3482-3488.
- (12) O. J. M. W. L. Birker, H. C. Freeman, *J. Am. Chem. Soc.*, 1977, **99**, 6890-6899.
- (13) P. J. M. W. L. Birker, *Inorg. Chem.*, 1979, **18**, 3502-3506.
- (14) D. Rusanova, K. E. Christensen, I. Persson, K. J. Pike, O. N. Antzutkin, X. Zou, R. Dupree, W. Forsling, *J. Coord. Chem.*, 2007, **60**, 517-525.
- (15) Y. B. Chen, Z.-J. Li, Y.-Y. Qin, Y. Kang, J.-K. Cheng, R.-F. Hu, Y.-H. Wen, Y.-G. Yao, *Inorg. Chem. Commun.*, 2003, **6**, 405-407.
- (16) C. W. Liu, T. Stubbs, R. J. Staples, J. P. Jr. Fackler, *J. Am. Chem. Soc.*, 1995, **117**, 9778-9779.
- (17) C. Latouche, S. Kahlal, E. Furet, P.-K. Liao, Y.-R. Lin, C.-S. Fang, J. Cuny, C. W. Liu, J.-Y. Saillard, *Inorg. Chem.*, 2013, **52**, 7752-7765.
- (18) D. Y. Shi, R. Zheng, M.-J. Sun, X. R. Cao, C.-X. Sun, C.-J. Cui, C.-S. Liu, J. W. Zhao, M. Du, *Angew. Chem. Int. Ed.*, 2017, **56**, 14637-14641.
- (19) X.-Y. Dong, M. Zhang, R.-B. Pei, Q. Wang, D.-H. Wei, S.-Q. Zang, Y.-T. Fan, T. C. W. Mak, *Angew. Chem. Int. Ed.*, 2016, **55**, 2073-2077.
- (20) H. Khan, H. Charles, C. S. Lee, *Appl. Surf. Sci.*, 2023, **607**, 155068.

- (21) Z.-L. Wu, C.-H. Wang, B. Zhao, J. Dong, F. Lu, W.-H. Wang, W.-C. Wang, G.-J. Wu, J.-Z. Cui, P. Cheng, *Angew. Chem. Int. Ed.*, 2016, **55**, 4938 -4942.
- (22) L. Li, L. Huang, Z.-Y. Liu, X.-J. Zhao, E.-C. Yang, *Z. Anorg. Allg. Chem.*, 2019, **645**, 623-630.
- (23) S. Cao, C.-J. Wang, G.-Q. Wang, Y. Chen, X.-J. Lv, W.-F. Fu, *RSC Adv.*, 2020, **10**, 5930-5937.
- (24) C.-B. Li, Y. L. Chu, J. J. He, J. J. Xie, J. W. Liu, N. Wang, J. W. Tang, *ChemCatChem*, 2019, **11**, 1-9.
- (25) S. Rajak, O. Schott, P. Kaur, T. Maris, G. S. Hanan, A. Duong, *Polyhedron*, 2020, **180**, 114412.
